# Supplementary material
Source: HighWire-hosted journal article supplement (https://bmjopen.bmj.com/content/9/1/e023637)
Supplement: inline-supplementary-material-1 [file inline-supplementary-material-1.pdf]

**Appendix 1: Outcome measure, The MenoScores Questionnaires (MSQ)**

| <b>Outcome</b>                          | <b>MSQ (11 scales and 1 single item, in total 51 items)</b> | <b>Number of items</b> | <b>Scale score*</b> |
|-----------------------------------------|-------------------------------------------------------------|------------------------|---------------------|
| <b>Primary outcome</b>                  | Hot flushes (HF)                                            | 2                      | 0-6                 |
| <b>Secondary outcomes</b>               | Day and night sweats (DNS)                                  | 2                      | 0-6                 |
|                                         | General sweating (GS)                                       | 2                      | 0-6                 |
|                                         | Menopausal-specific sleeping problems (MSSP)                | 2                      | 0-6                 |
|                                         | Emotional (EM)                                              | 12                     | 0-36                |
|                                         | Memory (MEM)                                                | 2                      | 0-6                 |
|                                         | Skin-hair (SH)                                              | 8                      | 0-16                |
|                                         | Physical (PHY)                                              | 8                      | 0-24                |
|                                         | Abdominal (ABD)                                             | 4                      | 0-8                 |
|                                         | Urinary and vaginal (URIN)                                  | 4                      | 0-12                |
|                                         | Sexual (SEX)                                                | 4                      | 0-8                 |
|                                         | Single item about tiredness                                 | 1                      | 0-3                 |
| <b>After last acupuncture treatment</b> | MSQ plus one item asking about the general effect           |                        |                     |
| * A higher scores denote more symptoms  |                                                             |                        |                     |
