# Supplementary material
Source: HighWire-hosted journal article supplement (https://bmjopen.bmj.com/content/9/1/e023637)
Supplement: inline-supplementary-material-2 [file inline-supplementary-material-2.pdf]

**Appendix 2: Time schedule: Enrolment, interventions, and assessments.**

| STUDY PERIOD                                       |           |            |                 |    |    |    |    |      |    |    |    |     |           |     |
|----------------------------------------------------|-----------|------------|-----------------|----|----|----|----|------|----|----|----|-----|-----------|-----|
|                                                    | Enrolment | Allocation | Post allocation |    |    |    |    |      |    |    |    |     | Long term |     |
| TIMEPOINT                                          | $-t_1$    | 0          | W*1             | W2 | W3 | W4 | W5 | W6   | W7 | W8 | W9 | W10 | W11       | W26 |
| <b>ENROLMENT:</b>                                  |           |            |                 |    |    |    |    |      |    |    |    |     |           |     |
| Eligibility screen                                 | x         |            |                 |    |    |    |    |      |    |    |    |     |           |     |
| Informed consent                                   | x         |            |                 |    |    |    |    |      |    |    |    |     |           |     |
| Eligibility screening questionnaire                | x         |            |                 |    |    |    |    |      |    |    |    |     |           |     |
| Allocation                                         |           | x          |                 |    |    |    |    |      |    |    |    |     |           |     |
| <b>INTERVENTIONS:</b>                              |           |            |                 |    |    |    |    |      |    |    |    |     |           |     |
| Intervention                                       |           |            | x               | x  | x  | x  | x  |      |    |    |    |     |           |     |
| Control                                            |           |            |                 |    |    |    |    | x    | x  | x  | x  | x   |           |     |
| <b>ASSESSMENTS****:</b>                            |           |            |                 |    |    |    |    |      |    |    |    |     |           |     |
| Eligibility screening questionnaire incl. HF scale | x         |            |                 |    |    |    |    |      |    |    |    |     |           |     |
| Baseline data                                      | x         |            |                 |    |    |    |    |      |    |    |    |     |           |     |
| MSQ                                                |           | x**        |                 |    | x  |    |    | x*** |    | x  |    |     | x         | x   |

\*W1= Study week 1, W2 = Study week 2 and so on.

\*\* MSQ is completed before allocation and first treatment.

\*\*\* Intervention group complete MSQ one week after final treatment (week 6). Control group complete MSQ before first treatment (week 6).

MSQ = MenoScores Questionnaire. HF scale = Hot flushes scale from MSQ.

\*\*\*\* Intermediate assessment at week 3. Main comparison of primary outcome at week 6 before “cross-over”. Assessment of legacy effect at week 11. Assessment of long-term effect at week 26.
