# Supplementary material
Source: HighWire-hosted journal article supplement (https://bmjopen.bmj.com/content/9/1/e023637)

### Appendix 3

Drawings are from the book “Akupunktur – på naturvidenskabeligt grundlag”.

Permission to reproduce the drawings is given by the publisher Klim, and the book’s author Palle Rosted

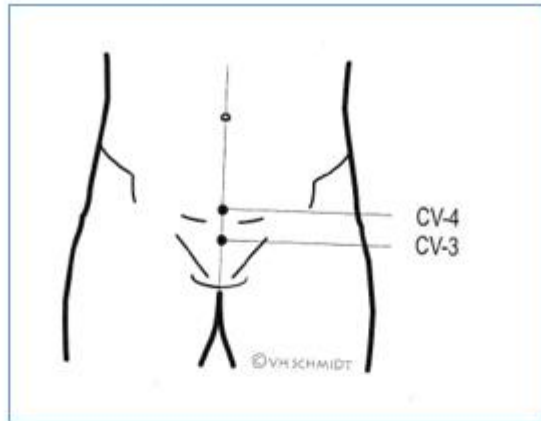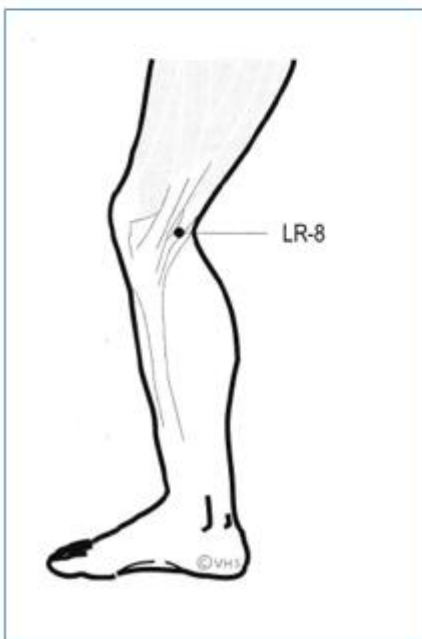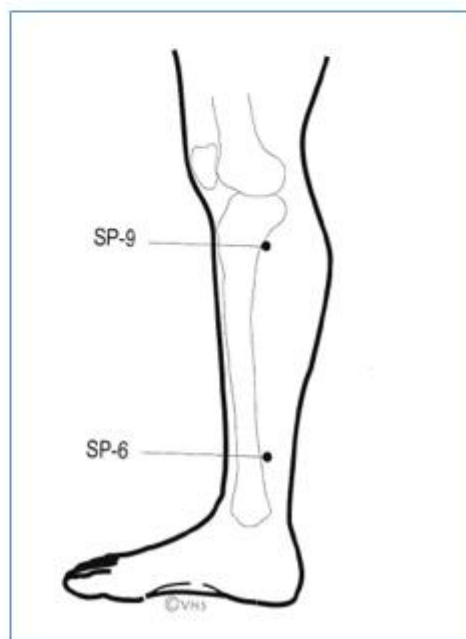

Supplement: inline-supplementary-material-3 [file inline-supplementary-material-3.pdf]
