# Supplementary material
Source: HighWire-hosted journal article supplement (https://bmjopen.bmj.com/content/9/1/e023637)
Supplement: inline-supplementary-material-4 [file inline-supplementary-material-4.pdf]

**Appendix 4. Observed reduction in mean scores in the two randomization groups at baseline and each of the follow-up time points**

|      | Week 0      |    |              |    | Week 3      |    |              |    | Week 6      |    |              |    |
|------|-------------|----|--------------|----|-------------|----|--------------|----|-------------|----|--------------|----|
|      | Control     |    | Intervention |    | Control     |    | Intervention |    | Control     |    | Intervention |    |
|      | Mean (SD)   | n  | Mean (SD)    | n  | Mean (SD)   | n  | Mean (SD)    | n  | Mean (SD)   | n  | Mean (SD)    | n  |
| HF   | 4.53 (0.90) | 34 | 4.72 (0.85)  | 36 | 4.09 (1.30) | 32 | 2.86 (1.59)  | 35 | 3.84 (1.64) | 31 | 2.43 (1.40)  | 35 |
| DNS  | 3.50 (1.56) | 34 | 3.61 (1.95)  | 36 | 3.34 (1.70) | 32 | 2.51 (1.56)  | 35 | 3.06 (1.91) | 31 | 1.94 (1.55)  | 35 |
| GS   | 1.41 (1.43) | 34 | 1.42 (1.25)  | 36 | 1.28 (1.53) | 32 | 0.71 (0.93)  | 35 | 1.48 (1.69) | 31 | 0.60 (0.81)  | 35 |
| MSSP | 2.97 (1.40) | 34 | 3.25 (1.30)  | 36 | 2.59 (1.78) | 32 | 2.00 (1.51)  | 35 | 2.94 (1.82) | 31 | 1.34 (1.47)  | 35 |
| EM   | 5.38 (5.22) | 34 | 6.31 (6.11)  | 36 | 5.94 (5.65) | 32 | 3.80 (4.21)  | 35 | 5.71 (6.69) | 31 | 3.49 (4.67)  | 35 |
| MEM  | 1.41 (1.44) | 34 | 1.19 (1.31)  | 36 | 1.41 (1.54) | 32 | 0.71 (1.10)  | 35 | 1.10 (1.42) | 31 | 0.66 (1.14)  | 35 |
| PHY  | 4.94 (3.56) | 34 | 5.11 (4.03)  | 36 | 4.78 (2.83) | 32 | 3.66 (3.40)  | 35 | 4.84 (3.72) | 31 | 3.31 (2.78)  | 35 |
| URIN | 1.29 (1.27) | 34 | 2.03 (1.80)  | 36 | 1.41 (1.41) | 32 | 1.74 (1.87)  | 35 | 1.61 (1.65) | 31 | 1.63 (1.52)  | 35 |
| ABD  | 1.59 (1.67) | 34 | 1.67 (1.49)  | 36 | 1.50 (1.48) | 32 | 1.26 (1.15)  | 35 | 1.68 (1.99) | 31 | 1.09 (1.22)  | 35 |
| SH   | 2.68 (2.07) | 34 | 3.11 (2.59)  | 36 | 3.28 (2.41) | 32 | 2.26 (2.25)  | 35 | 2.94 (2.62) | 31 | 1.83 (1.64)  | 35 |
| SEX  | 2.23 (1.92) | 26 | 2.19 (1.55)  | 27 | 2.48 (1.85) | 25 | 1.58 (1.58)  | 26 | 1.61 (1.73) | 23 | 1.54 (1.55)  | 28 |
| TR   | 1.03 (1.03) | 34 | 1.08 (0.84)  | 36 | 1.19 (0.97) | 32 | 0.91 (1.02)  | 35 | 1.19 (1.14) | 31 | 0.83 (0.89)  | 35 |
